# Supplementary material for: Effects of food on pharmacokinetics and safety of metformin hydrochloride tablets: A meta-analysis of pharmacokinetic, bioavailability, or bioequivalence studies
Source: PubMed Central journal article supplement — Heliyon. 2023 Jul 1;9(7):e17906. doi: 10.1016/j.heliyon.2023.e17906 (PMC10344758; doi:10.1016/j.heliyon.2023.e17906), 2023-07-01
Supplement: mmc3.pdf [file mmc3.pdf]

Addition of authorship

**Reference:** HELIYON-D-23-12877

**Article Entitled:** Effects of Food on Pharmacokinetics and Safety of Metformin Hydrochloride Tablets: A Meta-analysis of Pharmacokinetic, Bioavailability, or Bioequivalence studies

**Authors:** Ming-Li Sun<sup>1\*</sup>, Fang Liu<sup>2</sup>, Ping Yan<sup>2</sup>, Wei Chen<sup>3</sup>, Xing-He Wang<sup>1\*</sup>

**Affiliations:** <sup>1</sup>, Phase I Clinical Trial Research Center, Beijing Shijitan Hospital Affiliated to Capital Medical University, Beijing, 100038, People's Republic of China.

<sup>2</sup>, Department of Cardiology, Aviation General Hospital, China Medical University, Beijing 10012, People's Republic of China.

<sup>3</sup>, Department of Intensive Care Unit, Beijing Shijitan Hospital Affiliated to Capital Medical University, Beijing, 100038, People's Republic of China.

**\*, Corresponding authors:** Ming-Li Sun and Xing-He Wang contributed equally to this work and are co-corresponding authors. (Ming-Li has been designated as corresponding author during the submission process)

**Ming-Li Sun** Phone: +86-13552659827; Email: [sunmingli@bjsjth.cn](mailto:sunmingli@bjsjth.cn); Address: 10 Teyi Road Yangfangdian, Haidian District, Beijing, 100038, the People 's Republic of China.

**Xing-He Wang** Phone: +86-15301378575; Email: [wangxh@bjsjth.cn](mailto:wangxh@bjsjth.cn); Address: 10 Teyi Road Yangfangdian, Haidian District, Beijing, 100038, the People 's Republic of China.

Because of valuable advice for the revision of the paper provided by Wang XH, which is crucial, and constructive suggestions from Wang XH which helped to improve the framework and enrich the content of the paper, we need to change the current manuscript's author order, as listed above.

**Author contributions:** Study concept and design: Sun ML. Acquisition of data, analysis and interpretation of data, statistical analysis: Sun ML, Liu F, Yan P and Chen W. Critical revision of the manuscript for important intellectual content: Wang XH. Study supervision: Wang XH. Sun ML wrote the first draft, Liu F, Yan P, Chen W, and Wang XH edited the manuscript. All authors had full access to the data and take responsibility for the integrity of the data and accuracy of the analysis.

After consultations, all the authors agreed with the addition of Wang XH in this paper, and all the authors agreed with the rearrangement of the names. In the final version of the article, Wang XH is tagged as Co-corresponding authors.

Below are the signatures of all authors.

Signed: Ming-Li Sun      Fang Liu      Ping Yan  
Wei Chen      Xing-He Wang

**Date:**2023.05.24
