# Supplementary material for: Effects of food on pharmacokinetics and safety of metformin hydrochloride tablets: A meta-analysis of pharmacokinetic, bioavailability, or bioequivalence studies
Source: PubMed Central journal article supplement — Heliyon. 2023 Jul 1;9(7):e17906. doi: 10.1016/j.heliyon.2023.e17906 (PMC10344758; doi:10.1016/j.heliyon.2023.e17906), 2023-07-01
Supplement: mmc4.pdf [file mmc4.pdf]

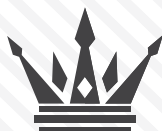

# EDITORIAL

## CERTIFICATE

**Authors:**

**Ming-Li Sun, et al.**

**Document title:**

**Effects of food  
on pharmacokinetics and safety of  
metformin hydrochloride tablets: A  
systematic review and meta-analysis**

**Date Issued:**

**6 Apr 2022**

**Cambridge Proofreading LLC**

This document certifies that the above manuscript was proofread and edited by Cambridge Proofreading LLC.

This document certifies that the above manuscript was proofread and edited by Cambridge Proofreading Worldwide LLC. The document was edited for proper English language, grammar, punctuation, spelling, and overall style by one or more of our academic editors. The editor endeavoured to ensure that the author's intended meaning was not altered during the review. All amendments were tracked with the Microsoft Word 'Track Changes' feature. Therefore, the authors had the option to reject or accept each change individually.

Kind regards,  
Cambridge Proofreading

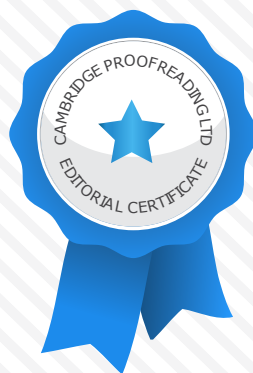

Cambridge Proofreading Worldwide LLC is a registered company headquartered in Chicago, Illinois, USA with a global presence. All of our editors are native speakers from USA and the UK. Our Certificate of Good Standing can be found in the Illinois state business database by searching our name here.
