# Supplementary material for: Effects of food on pharmacokinetics and safety of metformin hydrochloride tablets: A meta-analysis of pharmacokinetic, bioavailability, or bioequivalence studies
Source: PubMed Central journal article supplement — Heliyon. 2023 Jul 1;9(7):e17906. doi: 10.1016/j.heliyon.2023.e17906 (PMC10344758; doi:10.1016/j.heliyon.2023.e17906), 2023-07-01
Supplement: mmc5.pdf [file mmc5.pdf]

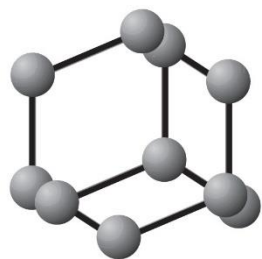

**BENTHAM  
SCIENCE**

Executive Suite Y, # 3

P. O. Box 7917

SAIF Zone

Sharjah, UAE

Tel: +971 6 5571132

Fax: +971 6 5571134

Email: [services@benthamscience.net](mailto:services@benthamscience.net)

Date: June 27<sup>th</sup>,2022

**CERTIFICATE OF ENGLISH EDITING**

This is to certify that the manuscript **Ref # BMS-CDM-2022-HT45-4311-1** undergone English language editing for grammar, clarity of expression, sentence structure, punctuation, spelling and typographical errors. The language issues have been corrected while all efforts have been made to maintain the originality and intent of the content. This manuscript now meets the standards of English Language expected for publication.

**Manuscript: Effects of Food on Pharmacokinetics and Safety of Metformin Hydrochloride Tablets: A Systematic Review and Meta-analysis**

**Author: Dr. Sun**

Sincerely,

Leena Menon

Corporate Manager
